# Supplementary material for: Expanding heterochromatin reveals discrete subtelomeric domains delimited by chromatin landscape transitions
Source: HighWire-hosted journal article supplement (doi:10.1101/gr.236554.118), 2018-10-24
Supplement: Supplemental_Table_S1.xlsx [file Supplemental_Table_S1.xlsx]

## Sheet: sup_tab1
#Supplemental_Table_S1
#List of detected binding sites of Sir3 within euchromatin. All non-subtelomeric Sir3 binding sites (n=18) (defined as euchromatic site at which at least two neighbouring probes are bound (z-score >0.5) by Sir3 upon overexpression of SIR3) together with the change in transcript levels (read density) for the flanking genes in WT versus SIR3 overexpressing or SIR3 deleted strains.
						RNA levels and Significance						Sir3 binding
	Coordinates					log2(Mutant/WT)			False Discovery Rate (EdgeR)			this study				Sperling et al.	Mitsumori et al.
Site #	Chromosome	Start	Stop	Flanking gene(s)	Type	SIR3 oe vs WT	SIR3-A2Q oe vs WT	sir3 vs WT	SIR3 oe vs WT	SIR3-A2Q oe vs WT	sir3 vs WT	WT	pADH-SIR3	pTEF-SIR3	pGPD-SIR3 (W303)	H3∆4-30	G1	Extended upon oe
1	chrI	44488	45151	YAL053W	Intergene	0.061173	0.0458215	-0.100377	n.s	n.s	n.s	no	1of2	yes	yes	yes
1	chrI	44488	45151	YAL054C	Intergene	0.308256	-0.141433	-0.171632	n.s	n.s	n.s	no	1of2	yes	yes	yes
2	chrI	189742	192296	YAR035W	Gene body	-0.443228	0.176076	0.152634	n.s	n.s	n.s	yes	yes	yes	yes	yes	CN1
3	chrII	428552	428610	YBR092C	Gene body	0.308479	-0.0929927	-0.164908	n.s	n.s	n.s	no	yes	yes	yes	no
4	chrIII	30013	30532	YCL054W	Intergene	0.0630619	0.111328	-0.386945	n.s	n.s	n.s	no	no	no	yes	yes
4	chrIII	30013	30532	YCL055W	Intergene	0.213258	-0.871789	-1.08355	n.s	n.s	0.0184802	no	no	no	yes	yes
5	chrIII	50934	52028	YCL040W	Gene body	-0.433121	-0.875469	-0.0913722	n.s	n.s	n.s	no	yes	yes	yes	yes
6	chrIV	436567	436626	-	Flanks 2 tRNAs	-	-	-	-	-	-	no	1of2	yes	yes	yes	CN17
7	chrIV	1430227	1430284	YDR488C	Gene body	0.186633	-0.0590637	-0.363863	n.s	n.s	n.s	yes	yes	yes	yes	yes	CN4	no
8	chrVI	181554	184062	YFR017C	Gene body	-0.74014	-0.717615	0.124406	n.s	n.s	n.s	yes	yes	yes	yes	yes	CN7	yes
8	chrVI	181554	184062	YFR018C	Gene body	-0.16215	0.386437	0.169644	n.s	n.s	n.s	yes	yes	yes	yes	yes	CN7	yes
9	chrVIII	175722	175767	YHR033W	Gene body	-0.0437899	0.28859	0.163437	n.s	n.s	n.s	1of2	1of2	no	yes	yes
10	chrX	360277	360518	YJL043W	Gene_body	-1.30141	-0.134873	-0.594697	n.s	n.s	n.s	1probeonly	1of2	no	1of2	yes
11	chrX	683821	683880	YJR137C	Intergene	-0.983506	-1.03379	0.311297	0.000424607	0.000669432	n.s	yes	yes	yes	yes	yes	CN11	no
11	chrX	683821	683880	YJR138W	Intergene	0.0268616	0.0695385	0.0873611	n.s	n.s	n.s	yes	yes	yes	yes	yes	CN11	no
12	chrXI	68881	68932	YKL198C	Gene body	-0.0439545	-0.126564	-0.169925	n.s	n.s	n.s	1of2	yes	yes	yes	yes		no
13	chrXII	1012859	1012911	YLR438W	Gene body	0.237945	0.0723912	0.739145	n.s	n.s	n.s	1of2	yes	yes	yes	yes		yes
14	chrXII	1020034	1022147	YLR442C	Gene body	4.72219	4.82152	-3.61669	1.45e-81	1.55368e-85	6.97864e-45	no	no	yes	yes	no
15	chrXIII	757329	758041	YMR244W	Gene body	-0.909772	0.174471	-0.163335	n.s	n.s	n.s	1of2	yes	yes	yes	yes	CN25
16	chrXIV	25008	25466	YNL327W	Gene body	0.0718776	-0.00604942	-0.0823259	n.s	n.s	n.s	no	no	yes	yes	no
17	chrXV	480828	480875	YOR084W	Gene body	-0.120952	0.425452	0.0528086	n.s	n.s	n.s	no	1of2	no	yes	yes
18	chrXVI	520221	520280	YPL016W	Intergene	-0.0587192	0.0416072	0.0689468	n.s	n.s	n.s	1of2	yes	yes	yes	yes		oneprobe
18	chrXVI	520221	520280	IRC15	Intergene	-1.55823	-0.754713	0.0543822	0.0395888	n.s	n.s	1of2	yes	yes	yes	yes		oneprobe
