# Supplementary material for: Expanding heterochromatin reveals discrete subtelomeric domains delimited by chromatin landscape transitions
Source: HighWire-hosted journal article supplement (doi:10.1101/gr.236554.118), 2018-10-24
Supplement: Supplemental_Table_S2.xlsx [file Supplemental_Table_S2.xlsx]

## Sheet: sup_tab2
#Supplemental table 2: yeast strains used in this study.
	ID	Mating T.	genotype	background
191		alpha	ade2-1::ADE2 adh4::URA3-4xUASG-(C1-3A)n ppr1∆::HIS3	(W303)
			rap1::GFP-RAP1(LEU2)
1254		alpha	ade2-1::ADE2 adh4::URA3-4xUASG-(C1-3A)n ppr1∆::HIS3	(W303)
			rap1::GFP-RAP1(LEU2) sir3::GPD-SIR3(NAT)
1256		alpha	ade2-1::ADE2 adh4::URA3-4xUASG-(C1-3A)n ppr1∆::HIS3	(W303)
			rap1::GFP-RAP1(LEU2) sir3::GPD-sir3-A2Q(NAT)
2487		a	ade2-1::ADE2 hml∆::HPH rap1::RAP1-GFP(LEU2)	(W303)
2627		a	ade2-1::ADE2 hml∆::HPH rap1::RAP1-GFP(LEU2) sir3::pADH-SIR3(NAT)	(W303)
2629		a	ade2-1::ADE2 hml∆::HPH rap1::RAP1-GFP(LEU2) sir3::pTEF-SIR3(NAT)	(W303)
2554		a	ade2-1::ADE2 hml∆::HPH rap1::RAP1-GFP(LEU2) sir3::GPD-Sir3(NAT)	(W303)
1667		a	RAD5+ rap1::RAP1-GFP(LEU2) RDN1::ADE2 sir2::GPD-SIR2(KanMX)	(W303)
1668		a	RAD5+ rap1::RAP1-GFP(LEU2) RDN1::ADE2 sir2::GPD-SIR2(KanMX)sir3::GPD-SIR3(NAT)	(W303)
779		a	ade2-1::ADE2 sir3::SIR3-GFP(LEU2)	(W303)
3441		a	ade2-1::ADE2 sir3::(KAN) pADH-SIR3-GFP(LEU2)	(W303)
3442		a	ade2-1::ADE2 sir3::(KAN)pTEF-SIR3-GFP(LEU2)	(W303)
3443		a	ade2-1::ADE2 sir3::(KAN) pGPD-SIR3-GFP(LEU2)	(W303)
2056		a	can1::MFA1pr-HIS3 hht1-hhf1::NatMX4 hht2-hhf2::[HHTS-HHFS]*-URA3 where H4WT	BY4733
2986		a	can1::MFA1pr-HIS3 hht1-hhf1::NatMX4 hht2-hhf2::[HHTS-HHFS]*-URA3 where H3∆4-30 Rap1-GFP(LEU2)	BY4733
2987		a	can1::MFA1pr-HIS3 hht1-hhf1::NatMX4 hht2-hhf2::[HHTS-HHFS]*-URA3 where H3∆4-30 Rap1-GFP(LEU2) pGPD-SIR3(NAT)	BY4733
2476		a	rap1::GFP-RAP1(LEU2) sir3::GPD-SIR3(NAT)	BY4741
3004		alpha	ade2-1::ADE2 adh4::URA3-4xUASG-(C1-3A)n ppr1∆::HIS3	(W303)
			rap1::GFP-RAP1(LEU2) bre1∆::KanMx
3123		alpha	ade2-1::ADE2 adh4::URA3-4xUASG-(C1-3A)n ppr1∆::HIS3	(W303)
			rap1::GFP-RAP1(LEU2) bre1∆::KanMx SIR3::pGPD-SIR3 (NatMx)
3180		alpha	ade2-1::ADE2 adh4::URA3-4xUASG-(C1-3A)n ppr1∆::HIS3	(W303)
			rap1::GFP-RAP1(LEU2) dot1∆::KanMx
3181		alpha	ade2-1::ADE2 adh4::URA3-4xUASG-(C1-3A)n ppr1∆::HIS3	(W303)
			rap1::GFP-RAP1(LEU2) set1∆::KanMx
3182		alpha	ade2-1::ADE2 adh4::URA3-4xUASG-(C1-3A)n ppr1∆::HIS3	(W303)
			rap1::GFP-RAP1(LEU2) dot1∆::KanMx pGPD-SIR3-A2Q (NAT)
3183		alpha	ade2-1::ADE2 adh4::URA3-4xUASG-(C1-3A)n ppr1∆::HIS3	(W303)
			rap1::GFP-RAP1(LEU2) dot1∆::KanMx pGPD-SIR3 (NAT)
3184		alpha	ade2-1::ADE2 adh4::URA3-4xUASG-(C1-3A)n ppr1∆::HIS3	(W303)
			rap1::GFP-RAP1(LEU2) set1∆::KanMx pGPD-SIR3(NAT)
2838		alpha	ade2-1::ADE2 adh4::URA3-4xUASG-(C1-3A)n ppr1∆::HIS3	(W303)
			rap1::GFP-RAP1(LEU2) rpd3∆::KanMx
2841		alpha	ade2-1::ADE2 adh4::URA3-4xUASG-(C1-3A)n ppr1∆::HIS3	(W303)
			rap1::GFP-RAP1(LEU2) rpd3∆::KanMx pGPD-SIR3(NAT)
3301		1N	ade2-1::ADE2 adh4::URA3-4xUASG-(C1-3A)n ppr1∆::HIS3	(W303)
			rap1::GFP-RAP1(LEU2) set2∆::(KanMx)
3333		1N	ade2-1::ADE2 adh4::URA3-4xUASG-(C1-3A)n ppr1∆::HIS3	(W303)
			rap1::GFP-RAP1(LEU2) set2∆::(KanMx) sir3::GPD-SIR3(NAT)
